# Supplementary material for: Overview and preliminary results of the Surface Ocean Aerosol Production (SOAP) campaign
Source: Copernicus journal article supplement (doi:10.5194/acp-17-13645-2017), 2017-11-16
Supplement: Supplementary file 1 [file acp-17-13645-2017-supplement.pdf]

Supplement of Atmos. Chem. Phys., 17, 13645–13667, 2017  
<https://doi.org/10.5194/acp-17-13645-2017-supplement>  
© Author(s) 2017. This work is distributed under  
the Creative Commons Attribution 4.0 License.

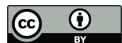

*Supplement of*

## **Overview and preliminary results of the Surface Ocean Aerosol Production (SOAP) campaign**

**Cliff S. Law et al.**

*Correspondence to:* Cliff S. Law ([cliff.law@niwa.co.nz](mailto:cliff.law@niwa.co.nz))

The copyright of individual parts of the supplement might differ from the CC BY 4.0 License.

| <b>Voyage</b> | <b>Location</b>                    | <b>Date</b>         | <b>Science focus</b>                                                                                                                                                                                   | <b>Observational framework</b>                                                                          | <b>Summary publication</b>                        |
|---------------|------------------------------------|---------------------|--------------------------------------------------------------------------------------------------------------------------------------------------------------------------------------------------------|---------------------------------------------------------------------------------------------------------|---------------------------------------------------|
| ACE-1         | Sub-Antarctic<br>40-58°S 135-157°E | Nov-Dec<br>1995     | Aerosol processes and production in the remote MBL                                                                                                                                                     | Shipboard biogeochemistry & processes coordinated, ground stations and over flight atmospheric sampling | Griffiths et al (1999)                            |
| GASEX - 98    | Atlantic                           | May-June<br>1998    | Direct & indirect estimates of KCO <sub>2</sub> , and associated physical drivers & biogeochemistry                                                                                                    | Lagrangian dual tracer study in algal bloom in warm core eddy                                           | McGillis et al (2001)                             |
| ACSOE         | N. Atlantic                        | June-July<br>1998   | Trace gases, biogeochemistry and productivity                                                                                                                                                          | Lagrangian SF <sub>6</sub> tracer in anti-cyclonic eddy                                                 | Jickells et al (2008)                             |
| DISCO         | N. Sea                             | June 1999           | Processes, rates and controls on marine DMS cycling                                                                                                                                                    | Lagrangian SF <sub>6</sub> tracer in a coccolithophore bloom                                            | Burkill et al (2002)                              |
| SAGE          | S. W. Pacific<br>sub-Antarctic     | March-April<br>2004 | The influence of iron addition on trace gas cycling and biogeochemistry, with estimates of K and physical processes                                                                                    | Lagrangian dual tracer study with iron addition in cyclonic eddy                                        | Harvey et al (2010)                               |
| P2P           | Offshore,<br>Tasmania              | 2006                | Secondary organic aerosol, MBL nucleation, coastal macroalgae, iodine                                                                                                                                  | Cape Grim station based with offshore coastal vessel measurements                                       | Cainey et al (2007)                               |
| DOGEE-SOLAS   | N. Atlantic                        | June-July<br>2007   | Parameterizing the gas exchange by constraining K and its physical controls                                                                                                                            | Artificial surfactant release in 3 Lagrangian dual tracer experiments                                   | Salter et al (2011)                               |
| GASEX III     | Southern<br>Ocean                  | Feb-April<br>2008   | K and air-sea CO <sub>2</sub> flux estimation, including physical controls and some biogeochemistry                                                                                                    | 2 Lagrangian dual tracer studies                                                                        | Ho et al (2011)                                   |
| ACSOS         | Arctic                             | Aug-Sept<br>2008    | Formation and life cycle of low-level Arctic clouds; the interaction with the sea ice and ocean and associated physical, chemical, and biological processes                                            | Repeat regional shipborne transects, complemented by on-ice & airborne measurements                     | Tjernström et al (2014)                           |
| VAMOS         | S.E. Pacific                       | Oct-Nov<br>2008     | Determine links between aerosols, clouds and precipitation and impacts on stratocumulus radiative properties, and the physical and chemical couplings between the upper ocean and the lower atmosphere | Airborne & shipborne platforms complemented by fixed coastal sites & moorings                           | Wood et al (2011)                                 |
| SIPEX(II)     | Australian<br>Antarctic<br>Sector  | Sep-Nov<br>2011     | Biogeochemical processes and aerosol associated with sea-ice                                                                                                                                           | East Antarctic pack ice (south of 61.5 S, between 112 and 122 E)                                        | Vancoppenolle et al 2013;<br>Humphries et al 2016 |

|      |                              |                             |                                                                                                                                |                                                              |            |
|------|------------------------------|-----------------------------|--------------------------------------------------------------------------------------------------------------------------------|--------------------------------------------------------------|------------|
| SOAP | S. W. Pacific Frontal waters | Feb 2011 & March-April 2012 | Determine the physical and biogeochemical controls of k, DMS and CO <sub>2</sub> fluxes, and also on aerosol & MBL composition | Lagrangian drifter study of 3 different phytoplankton blooms | This paper |
|------|------------------------------|-----------------------------|--------------------------------------------------------------------------------------------------------------------------------|--------------------------------------------------------------|------------|

**Table S1.** Selected related multidisciplinary studies of air-sea interaction related to the SOAP campaign.

## References

- Burkill PH, Archer SD, Robinson C, Nightingale PD, Groom SB, Tarran GA, Zubkov MV. Dimethyl sulphide biogeochemistry within a coccolithophore bloom (DISCO): an overview. *Deep Sea Research Part II: Topical Studies in Oceanography* 49(15): 2863-2885. 2002.
- Cainey JM, Keyword M, Grose MR, Krummel P, Galbally IE, Johnston P, Gillett RW, Meyer M, Fraser P, Steele P, Harvey M, Kreher K, Stein T, Ibrahim O, Ristovski ZD, Johnson G, Fletcher CA, Bigg EK, Gras JL. Precursors to Particles (P2P) at Cape Grim 2006: Campaign Overview, Environmental Chemistry, 4:143-150, doi:10.1071/EN07041, 2007.
- Griffiths FB, Bates TS, Quinn PK, Clementson LA, Parslow JS. Oceanographic context of the First Aerosol Characterization Experiment (ACE 1): A physical, chemical, and biological overview. *Journal of Geophysical Research: Atmospheres*, 104(D17): 21649-21671. 1999.
- Harvey MJ, Law CS, Smith MJ, Hall JA, Abraham ER, Stevens C, Hadfield M, Ho DT, Ward B, Archer SD, Cainey J, Currie K, Devries D, Ellwood M, Hill P, Jones GB, Katz D, Kuparinen J, Macaskill B, Main W, Marriner A, McGregor J, McNeil C, Minnett PJ, Nodder S, Peloquin J, Pickmere S, Pinkerton M, Safi K, Thompson R, Walkington M, Wright SW, Ziolkowski L. The SOLAS Air-Sea Gas Exchange Experiment (SAGE) 2004. *Deep-Sea Res II*, 58:753-763. 2011.
- Ho DT, Sabine CL, Hebert D, Ullman DS, Wanninkhof R, Hamme RC, Strutton PG, Hales B, Edson JB, Hargreaves BR. Southern Ocean Gas Exchange Experiment: Setting the Stage. *J. Geophys. Res.*, 116, C00F08, doi:10.1029/2010JC006852. 2011.
- Humphries RS, Klekociuk, AR, Schofield, R, Keyword, M, Ward, J, and Wilson, SR. Unexpectedly high ultrafine aerosol concentrations above East Antarctic sea ice, *AtmosChemPhys*, 16, 2185-2206, doi:105194/acp-16-2185-2016. 2016.
- Jickells TD, Liss PS, Broadgate W, Turner S, Kettle AJ, Read J, Baker J, Cardenas LM, Carse F, Hamren-Larssen M, Spokes L, Steinke M, Thompson A, Watson AJ, Archer SD, Bellerby RGJ, Law CS, Nightingale PD, Liddicoat MI, Widdicombe CE, Bowie A, Gilpin LC, Moncoiffé G, Savidge G, Preston T,

Hadziabdic P, Frost T, Upstill-Goddard RC, Pedrós-Alió C, Simó R, Jackson A, Allen A, DeGrandpre. Lagrangian biogeochemical study of an eddy in the North East Atlantic, *Prog. Oceanography* 76:366–398. 2008.

McGillis WR, Edson JB, Ware JD, Dacey JW, Hare JE, Fairall CW, Wanninkhof R. Carbon dioxide flux techniques performed during GasEx-98. *Marine Chemistry* 75(4):267-80. 2001.

Salter ME, Upstill-Goddard RC, Nightingale PD, Archer SD, Blomquist B, Ho DT, Huebert B, Schlosser P, Yang M. Impact of an artificial surfactant release on air-sea gas fluxes during Deep Ocean Gas Exchange Experiment II. *Journal of Geophysical Research: Oceans* 116, C11. 2011

Tjernström M, Leck C, Birch CE, Bottenheim JW, Brooks BJ, Brooks IM, Bäcklin L, Chang RW, de Leeuw G, Di Liberto L, De La Rosa S. The Arctic Summer Cloud Ocean Study (ASCOS): overview and experimental design. *Atmospheric Chemistry and Physics*. 14(6):2823-69. 2014.

Wood R, Mechoso CR, Bretherton CS, Weller RA, Huebert B, Straneo F, Albrecht BA, Coe H, Allen G, Vaughan G, Daum P. The VAMOS ocean-cloud-atmosphere-land study regional experiment (VOCALS-REx): goals, platforms, and field operations. *Atmospheric Chemistry and Physics* 11(2):627-54. 2011.

Vancoppenolle M, Meiners KM, Michel C, Bopp L, Brabant F, Carnat G, Delille B, Lannuzel D, Madec G, Moreau S, Tison J-L, van der Merwe, P. Role of sea ice in global biogeochemical cycles: emerging views and challenges, *Quaternary Science Reviews*, 79:207-230. 2013.

| Station | NZST Date | NZST Time | Latitude | Longitude | SST (°C) | Salinity | MLD (m) | Chl-a (mg m <sup>-3</sup> ) | Nitrate (umol L <sup>-1</sup> ) | Location     |
|---------|-----------|-----------|----------|-----------|----------|----------|---------|-----------------------------|---------------------------------|--------------|
| 7502    | 15-Feb-12 | 9:00      | -44.608  | 174.773   | 13.92    | 34.43    | 14.2    | 1.02                        | 5.91                            | B1           |
| 7503    | 16-Feb-12 | 9:28      | -44.583  | 174.700   | 14.44    | 34.49    | 13.33   | 0.68                        | 5.56                            | B1           |
| 7504    | 17-Feb-12 | 9:14      | -44.550  | 174.712   | 14.99    | 34.56    | 14.35   | 1.08                        | 4.02                            | B1           |
| 7505    | 18-Feb-12 | 9:19      | -44.574  | 174.736   | n/a      | n/a      | 14.35   | 0.52                        | 0.11                            | B1           |
| 7506    | 19-Feb-12 | 7:34      | -44.336  | 175.243   | 14.68    | 34.44    | 16      | 0.88                        | 5.86                            | North of B1  |
| 7507    | 20-Feb-12 | 7:21      | -45.960  | 173.645   | 13.58    | 34.40    | 22.94   | 0.74                        | 3.77                            | S.W. station |
| 7508    | 21-Feb-12 | 7:02      | -43.741  | 176.965   | 15.12    | 34.61    | 22.95   | 0.65                        | 1.26                            | Enroute to E |
| 7509    | 21-Feb-12 | 17:20     | -43.483  | 179.114   | 15.88    | 34.77    | 21.8    | 0.28                        | <0.07                           | East of B2   |
| 7510    | 22-Feb-12 | 9:22      | -43.717  | 180.157   | 15.88    | 34.65    | 21.12   | 1.39                        | 0.08                            | B2           |
| 7511    | 22-Feb-12 | 13:28     | -43.597  | 180.179   | 15.90    | 34.66    | 21.12   | n/a                         | n/a                             | B2           |
| 7512    | 22-Feb-12 | 18:01     | -43.627  | 180.208   | 16.34    | 34.64    | 14.25   | n/a                         | n/a                             | B2           |
| 7513    | 23-Feb-12 | 7:17      | -43.710  | 180.238   | 15.72    | 34.56    | 18.96   | 0.58                        | 2.62                            | B2           |
| 7514    | 23-Feb-12 | 9:43      | -43.699  | 180.228   | 15.65    | 34.55    | 18.24   | 0.55                        | 2.50                            | B2           |
| 7515    | 23-Feb-12 | 12:06     | -43.691  | 180.257   | 15.92    | 34.64    | 24.91   | 0.64                        | 0.47                            | B2           |
| 7516    | 23-Feb-12 | 17:14     | -43.641  | 180.247   | 15.53    | 34.60    | 38.89   | 0.53                        | 1.56                            | B2           |
| 7517    | 24-Feb-12 | 7:03      | -43.667  | 180.236   | 15.56    | 34.58    | 38.89   | 0.61                        | 1.32                            | B2           |
| 7518    | 24-Feb-12 | 15:17     | -43.601  | 180.235   | 15.73    | 34.65    | 11.23   | 0.48                        | 1.15                            | B2           |
| 7519    | 25-Feb-12 | 9:26      | -43.557  | 180.316   | 15.44    | 34.56    | 29.23   | 0.67                        | 2.86                            | B2           |
| 7520    | 25-Feb-12 | 14:31     | -43.630  | 180.260   | 15.59    | 34.55    | 26.92   | 0.63                        | 2.92                            | B2           |
| 7521    | 26-Feb-12 | 6:55      | -43.963  | 180.692   | 15.77    | 34.78    | 25      | 0.51                        | 0.13                            | South of B2  |
| 7522    | 27-Feb-12 | 15:28     | -44.112  | 175.475   | 14.70    | 34.51    | 28.93   | 0.44                        | 3.94                            | NE B3a       |
| 7523    | 28-Feb-12 | 7:25      | -44.491  | 174.850   | 14.24    | 34.53    | 30.9    | 0.39                        | 2.21                            | B3 a         |
| 7524    | 28-Feb-12 | 13:10     | -44.542  | 174.873   | 14.36    | 34.49    | 29.46   | 0.29                        | 4.40                            | B3 a         |
| 7525    | 29-Feb-12 | 8:52      | -44.607  | 174.870   | 14.19    | 34.49    | 27.03   | 0.44                        | 4.42                            | B3 a         |
| 7526    | 29-Feb-12 | 13:03     | -44.545  | 174.883   | 14.39    | 34.50    | 27.03   | n/a                         | n/a                             | B3 a         |
|         |           |           |          |           |          |          |         |                             |                                 | Storm        |
| 7527    | 2-Mar-12  | 7:58      | -44.191  | 174.925   | 13.62    | 34.52    | 39.07   | 0.42                        | 5.28                            | B3 b         |
| 7528    | 2-Mar-12  | 14:57     | -44.192  | 174.927   | 13.71    | 34.54    | 44.79   | 0.45                        | 2.93                            | B3 b         |
| 7529    | 3-Mar-12  | 7:42      | -44.759  | 174.640   | 13.27    | 34.38    | 30.72   | 0.61                        | 5.34                            | B3 b         |
| 7530    | 3-Mar-12  | 14:45     | -44.781  | 174.652   | 13.03    | 34.39    | 44.11   | 0.49                        | 5.49                            | B3 b         |
| 7531    | 4-Mar-12  | 9:26      | -44.243  | 174.523   | 12.88    | 34.50    | 49.55   | 0.74                        | 3.86                            | B3 b         |
| 7532    | 4-Mar-12  | 15:23     | -44.243  | 174.522   | 12.83    | 34.48    | 39.51   | 1.01                        | 3.81                            | B3 b         |
| 7533    | 5-Mar-12  | 9:57      | -44.191  | 174.307   | 12.79    | 34.50    | 40.14   | 0.97                        | 2.84                            | B3 b         |

**Supplementary Table 2.** SOAP CTD station information, including surface water characteristics. Individual bloom occupation is indicated by the different colours. SST: Sea Surface Temperature; MLD: Surface Mixed layer depth; Chl-*a*: Chlorophyll-*a*.
